# Supplementary material
Source: PubMed Central journal article supplement (PMC8277953)
Supplement: mmc1.pdf [file mmc1.pdf]

## **Superior cellular and humoral immunity towards SARS-CoV-2 and alpha and beta VOC strains in COVID-19 convalescent as compared to the prime boost BNT162b2 vaccinated dialysis patients**

Arturo Blazquez-Navarro<sup>1,2\*</sup>, Lema Safi<sup>2\*</sup>, Toni L. Meister<sup>3\*</sup>, Constantin J. Thieme<sup>1</sup>, Sviatlana Kaliszczyk<sup>2</sup>, Krystallenia Paniskaki<sup>4</sup>, Mara Stockhausen<sup>2</sup>, Jan Hörstrup<sup>5</sup>, Okan Cinkilic<sup>6</sup>, Linus Flitsch-Kiefner<sup>7</sup>, Corinna Marheinecke<sup>3</sup>, Eike Steinmann<sup>7</sup>, Felix S. Seibert<sup>2</sup>, Ulrik Stervbo<sup>2</sup>, Timm H. Westhoff<sup>2\*</sup>, Stephanie Pfaender<sup>3\*</sup>, Toralf Roch<sup>1,2\*</sup>, Nina Babel<sup>1,2\*</sup>

<sup>1</sup>*Berlin Center for Advanced Therapies, Charité – Universitätsmedizin Berlin, Corporate Member of Freie Universität Berlin, Humboldt-Universität zu Berlin, Berlin, Germany*

<sup>2</sup>*Center for Translational Medicine and Immune Diagnostics Laboratory, Medical Department I, Marien Hospital Herne, University Hospital of the Ruhr-University Bochum, Herne, Germany*

<sup>3</sup>*Department of Molecular and Medical Virology, Ruhr-University Bochum, Bochum, Germany*

<sup>4</sup>*Department of Infectious Diseases, West German Centre of Infectious Diseases, University Hospital Essen, University Duisburg-Essen, Essen, Germany*

<sup>5</sup>*Berlin Department, KfH Kuratorium für Dialyse und Nierentransplantation e.V., Berlin, Germany*

<sup>6</sup>*Dialyse Schwerte, Schwerte, Germany*

<sup>7</sup>*Hagen Department, KfH Kuratorium für Dialyse und Nierentransplantation e.V., Hagen, Germany*

\*equal contribution

Corresponding author:

Prof. Nina Babel

Center for Translational Medicine, Medical Department I, Marien Hospital Herne, University Hospital of the Ruhr-University Bochum, Hölkeskampring 40, 44625 Herne, Germany and

Berlin Center for Advanced Therapies, Charité – Universitätsmedizin Berlin, Corporate Member of Freie Universität Berlin, Humboldt-Universität zu Berlin, Augustenburger Platz 1, 13353 Berlin, Germany

email: [nina.babel@elisabethgruppe.de](mailto:nina.babel@elisabethgruppe.de); [nina.babel@charite.de](mailto:nina.babel@charite.de)

**Table S1: Characteristics of convalescent and vaccinated hemodialysis patients**

| <b>Patient groups</b>                                                                             | <b>Convalescent</b> | <b>Vaccinated with BNTb162b</b> |
|---------------------------------------------------------------------------------------------------|---------------------|---------------------------------|
| No. of patients                                                                                   | 18                  | 22                              |
| Age in years; Median (range)                                                                      | 62 (39 – 78)        | 67 (43 – 80)                    |
| Sex (male/female)                                                                                 | 10/8 (55.6%/44.4%)  | 14/8 (63.6%/36.4%)              |
| Time since last antigenic contact (COVID-19 convalescence or vaccination) in days; Median (range) | 158 (61 – 390)      | 60 (17-441)                     |
| Hemodialysis                                                                                      | 18 (100.0%)         | 22 (100.0%)                     |
| Immunosuppressive medication                                                                      | 0 (0.0%)            | 0 (0.0%)                        |
| <b>Severity of COVID-19</b>                                                                       |                     |                                 |
| Mild (no, few symptoms)                                                                           | 15 (83%)            | 0                               |
| Moderate (hospitalization)                                                                        | 3 (17%)             | 0                               |
| Severe (hospitalization)                                                                          | 0 (0%)              | 0                               |
| <b>Cause of ESRD</b>                                                                              |                     |                                 |
| Diabetic nephropathy                                                                              | 4 (22.2%)           | 11 (50.0%)                      |
| Hypertensive kidney disease                                                                       | 4 (22.2%)           | 5 (22.7%)                       |
| Glomerulonephritis including vasculitis                                                           | 5 (27.8%)           | 1 (4.5%)                        |
| Other                                                                                             | 4 (22.2%)           | 4 (18.2%)                       |
| Not specified                                                                                     | 1 (5.6%)            | 1 (4.5%)                        |

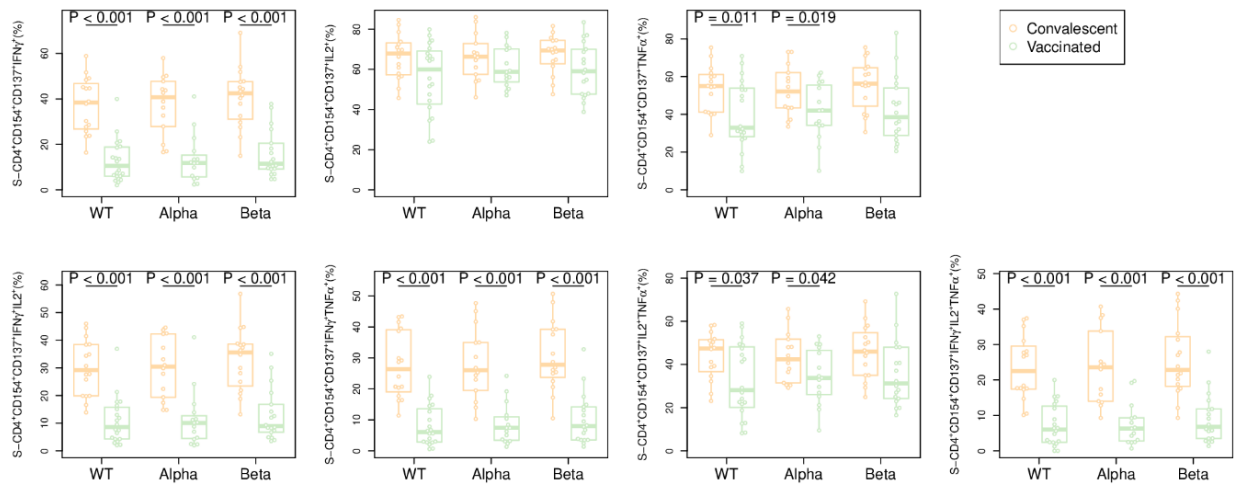

**Figure S1: Frequency of IFN $\gamma$ -, IL2-, and TNF $\alpha$ -producing cells among S-protein reactive CD4<sup>+</sup>CD154<sup>+</sup>CD137<sup>+</sup> T cells in convalescent and vaccinated hemodialysis patients**

Cytokine expression by activated CD4<sup>+</sup> T cells was evaluated in PBMC after stimulation with OPP of S-WT, alpha, and beta, only samples with a frequency of activated T cells over 0.01% are considered in this analysis. The upper row indicates the expression of IFN $\gamma$  (left), IL2 (middle) and TNF $\alpha$  (right). The lower row indicates the frequencies of bi-functional CD4<sup>+</sup>CD154<sup>+</sup>CD137<sup>+</sup> T cells that produce (from left to right): IL2 and IFN $\gamma$ , IFN $\gamma$  and TNF $\alpha$ , IL2 and TNF $\alpha$  as well as trifunctional CD4<sup>+</sup>CD154<sup>+</sup>CD137<sup>+</sup> T cells that produce IFN $\gamma$ , IL2, and TNF $\alpha$ . Frequencies of multicytokine-producing T cells were identified by Boolean gating. Box plots depict the median, first and third quartile of a variable; the maximum length of the whiskers corresponds to 1.5 times the interquartile range.

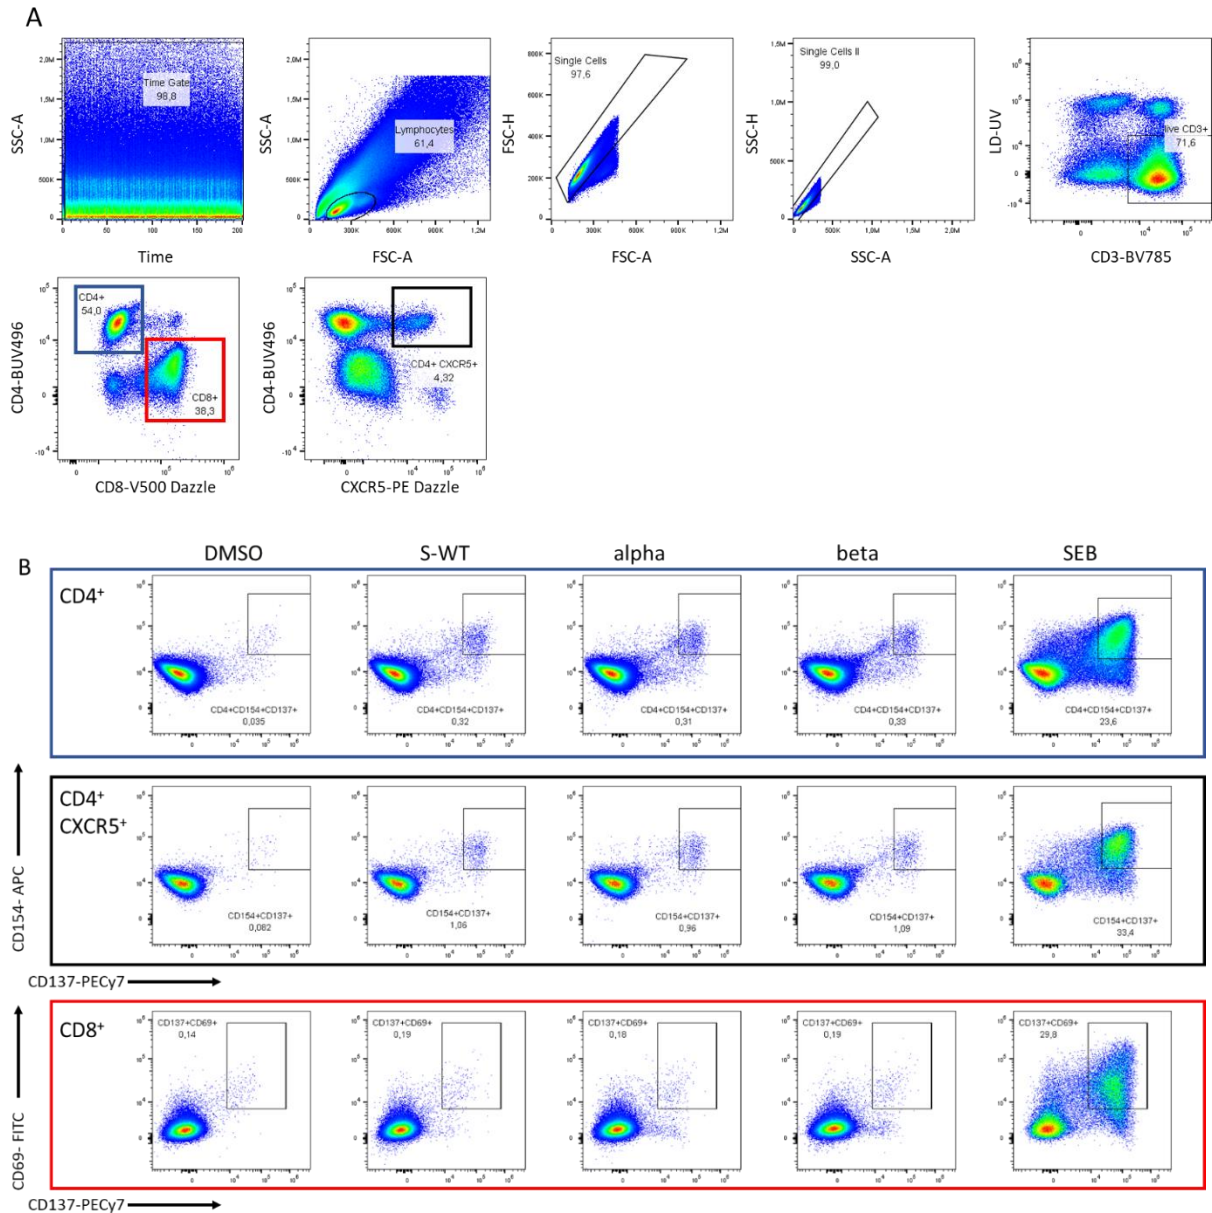

**Figure S2: Gating strategy to identify S-protein reactive T cells among CD4<sup>+</sup> T cells, CD4<sup>+</sup> CXCR5<sup>+</sup> T cells, and CD8<sup>+</sup> T cells**

PBMC were incubated for 16 hours with overlapping peptide pools (OPP) of the SARS-CoV-2 strains wildtype (WT), alpha, and beta in the presence of brefeldin A, which was added 2 hours after the OPP. Stimulations with DMSO as peptide diluent and *Staphylococcus aureus* enterotoxin B (SEB) as polyclonal stimulus served as negative and positive controls, respectively. Cells were acquired using a Cytoflex LX flow cytometer. **(A)** Representative gating to identify CD4<sup>+</sup> T cells, CD4<sup>+</sup> CXCR5<sup>+</sup> T cells, which share features of T follicular helper cells (T<sub>fh</sub>) and CD8<sup>+</sup> T cells. Top row from left to right: time gate followed by debris exclusion and lymphocyte identification; cell aggregated were excluded by SSC-H vs SSC-A and FSC-H vs FSC-A plots; live/dead (LD) and CD3 stainings identified live CD3<sup>+</sup> T cells; Bottom row, left: CD4<sup>+</sup> and CD8<sup>+</sup> T cell discrimination; right, CD4<sup>+</sup> CXCR5<sup>+</sup> T cells (T<sub>fh</sub>) identification. **(B)** Identification of T cells reactive against the wild-type S-protein (S-WT) and the S-proteins of the VOC alpha and beta among CD4<sup>+</sup> T cells (top, blue frame), CD4<sup>+</sup> CXCR5<sup>+</sup> T cells (middle, black frame), and CD8<sup>+</sup> T cells (bottom, red frame). Plots are representative for n=37 individuals that were either vaccinated against SARS-COV-2 or are convalescent after COVID-19.

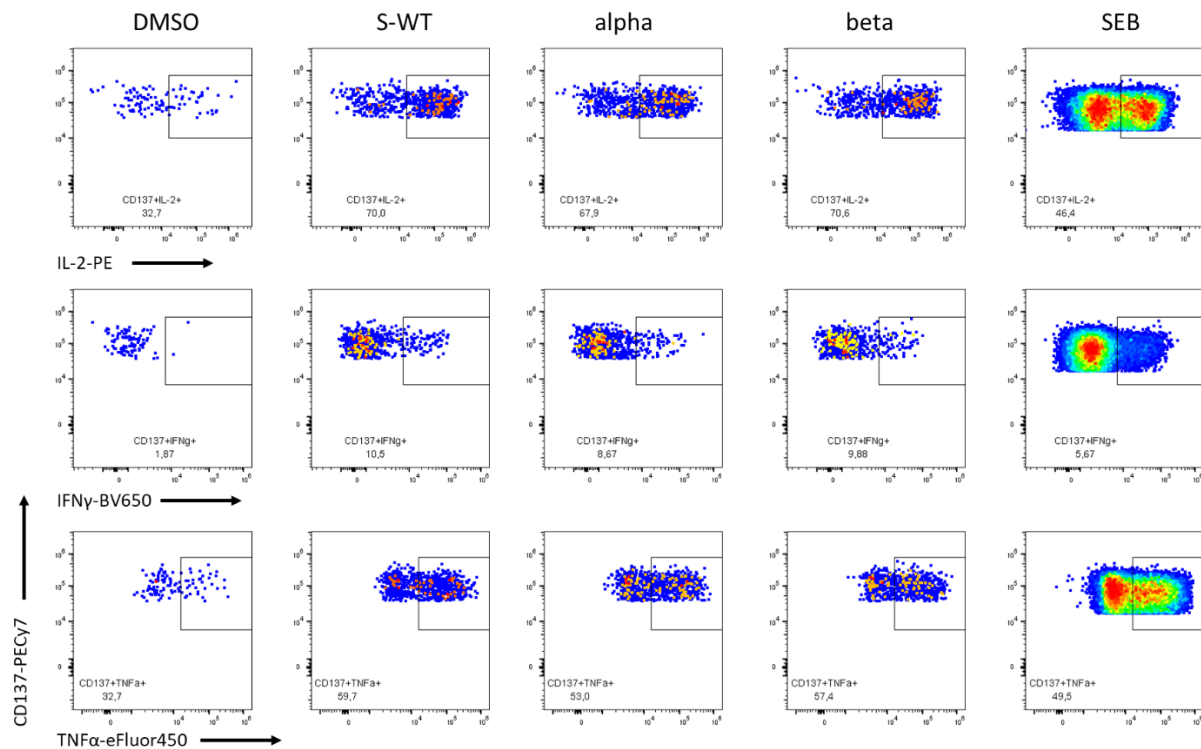

**Figure S3: Representative dot plots illustrating expression of IL2, TNF $\alpha$ , and IFN $\gamma$  by activated CD4<sup>+</sup>CD154<sup>+</sup>CD137<sup>+</sup> T cells.** PBMC were treated as described above. CD4<sup>+</sup>CD154<sup>+</sup>CD137<sup>+</sup> T cells were identified as shown in Supplementary figure 2. Expression of IL2 (top), IFN $\gamma$  (middle) and TNF $\alpha$  (bottom) in untreated (DMSO) PBMC and PBMC stimulated with OPP of S-WT, alpha, and beta. SEB served as positive control showing the overall capacity of the T cells to produce cytokines. Dot plots are representative for n=37 individual donors that were either vaccinated against SARS-COV-2 or are convalescent after COVID-19.

## **Supplementary Methods**

### **Study population and design**

For this study, 40 hemodialysis patients were recruited of whom 18 are convalescent and 22 were vaccinated two times with BNTb162b mRNA. Analysis was done in median 60 days post-vaccination (range 17-441 days) and 158 days (range 61-290 days) post infection in DP. The median age of DP was 64.8 years (range 39-80 years). Of the 40 participants, 24 (60%) were of male and 16 (40%) of female sex. The clinical characteristics of DP patients are summarized in Table S1. Most of the convalescent patients had a mild course of COVID-19 diseases. Only 3 out of 18 patients required hospitalization and short-term FiO<sub>2</sub> supply without any further medical supportive measures. The study was approved by the ethical committee of the Ruhr-University Bochum (20-6886; 20-7126). Written informed consent was obtained from all participants.

### **SARS-CoV-2 IgG antibody titers**

Serum was generated according to the manufacturer's instructions from blood collected into S-Monovette Z-Gel (Sarstedt). SARS-CoV-2 serum IgG levels were quantified in serum using the SARS-CoV-2 IgG kit (EUROIMMUN, Lübeck, Germany) according to the manufacturer's instructions. In brief, serum samples (n=39) were diluted 1:100 and added to plates pre-coated with recombinant SARS-CoV-2 S-WT protein. SARS-CoV-2 S1 protein-specific IgG was quantified using anti-human IgG conjugated to HRP, which catalyzed the conversion of 3,3',5,5'-tetramethylbenzidine (TMB) to 3,3',5,5'-tetramethylbenzidine diimine, whose absorbance was measured at 450 nm with reference at 620 nm a spectrophotometer (Molecular Devices). IgG S1-ELISA reactivity was evaluated as the ratio of the absorbance of the sample to the absorbance of the internal standard.

### **SARS-CoV-2 WT, alpha and beta neutralization assay**

The SARS-CoV-2 neutralization was performed using VeroE6 cells (kindly provided by C. Drosten and M. Müller), which were cultivated in Dulbecco's Modified Eagle's Medium (DMEM, supplemented with 10 % (v/v) fetal calf serum (FCS), 1% (v/v) non-essential amino acids, 100 IU/mL penicillin, 100 µg/mL streptomycin and 2 mM L-Glutamine). VeroE6 cells were seeded at  $1 \times 10^4$  cells/well one day prior the experiment. Sera from the hemodialysis patients (n=37) were heat-inactivated for 30 min at 56 °C and serially diluted 1:2 in a 96 well plate with an initial dilution of 1:10 in quadruplicates. In the next step, 200 TCID<sub>50</sub> of either wildtype virus hCoV-19/Germany/BY-Bochum-1/2020 (GISAID accession ID: EPI\_ISL\_1118929), VOC alpha RKI-0026\_B.1.1.7 (GISAID accession ID: EPI\_ISL\_751799), or VOC beta RKI-0029\_B.1.351 (GISAID accession ID: EPI\_ISL\_803957) was added to each well and incubated for 1 hour at 37 °C. Afterwards, the virus/serum suspension was transferred onto VeroE6 cells and incubated for 72 hours at 37 °C. After incubation, VeroE6 cells were stained with crystal violet following and optically analyzed for cytopathic effects (CPE). Based on CPE values, the 50% neutralization capacity (ND<sub>50</sub> value) was calculated using non-linear regression.

### **Preparation of Peripheral blood mononuclear cells (PBMCs) and stimulation with overlapping peptide pools from SARS-COV-2 S-protein VOC**

PBMCs were isolated and stimulated as previously described.<sup>1</sup> Briefly, from whole blood, PBMC were obtained by gradient centrifugation and stimulated with 15mer overlapping

peptides pools (OPP) with an 11 amino acids overlaps from SARS-CoV-2 S-WT, B1.1.7, and B.1.3.5.1 S-Proteins (JPT, Germany).

All OPP were dissolved in DMSO according to the manufacturer's instructions and used at a final concentration of 1 µg/ml. For each condition 2.5x10<sup>6</sup> PBMCs were plated in 96-UWell Plates in 200 µl RPMI media (Life Technologies, USA), supplemented with 1% Penicillin-Streptomycin-Glutamine (Sigma Aldrich, USA) plus 10% FCS (PAN-Biotech, Germany) and were treated with the different OPPS or DMSO alone as negative control for 16 hours. As a positive control, PBMC were stimulated with SEB (1 µg/ml, Sigma Aldrich). After incubation for 2 hours Brefeldin A (1 µg/ml, Sigma Aldrich, USA) was added. The SARS-CoV-2 OPP stimulated PBMC stained as previously described.<sup>1</sup>

Unless otherwise indicated, all antibodies used for flow cytometry were purchased from BioLegend, USA: Surface staining: Live-dead Fixable Blue Dead Cell Stain Kit (ThermoFisher, USA), CCR7 (CD197)-PerCP-Cy5.5; clone: G043H7, CD45RA-BV605; clone: HI100. CXCR5-PE-Dazzle594, clone: J252D4; CD3-BV785, clone: OKT3. Intracellular staining: CD4-BUV496, clone: SK3 (Ieu3a) (BD Biosciences, USA); CD8-V500; clone: RPA-T8 (BD Biosciences, USA); Granzyme B-AL700; clone: R712 (BD Biosciences, USA); IL2-PE; clone: MQ1-17H12; CD137 (4-1BB)-PE-Cy7; clone: 4B4-1; CD154 (CD40L)-APC/Cy7; clone: 24-31, TNFa-eFluor450; clone: MAb11 (eBioscience, USA), IFNγ-BV650; clone: 4S.B3; CD69-FITC, clone: FN50 (BD Biosciences, USA).

Immediately after antibody labelling samples were acquired on a CytoFlex LX flow cytometer (Beckman Coulter, USA). As a result of low cell counts after thawing, SARS-CoV-2 S-WT, S-alpha, and beta-reactive T cells could be measured in 36, 36, and 30 out of 40 DP, respectively. The threshold for an antigen-reactive T cell responses was set when the specific response after stimulation exceeded the background activation three times (stimulation index SI >3) as previously published.<sup>1,2</sup> For activated cells that are presented as frequency of CD4<sup>+</sup>, CD8<sup>+</sup>, or CD4<sup>+</sup> CXCR5<sup>+</sup> T cells, non-specific background in DMSO control was subtracted.

## Statistical Analysis

Flow cytometry data was analyzed using FlowJo version 10.7.1 (BD Biosciences, USA); gating strategy and representative dot plots are shown in Figures S2-3. Statistical analysis was performed using R, version 4.0.4. Binary variables are depicted as bar plots, continuous variables are depicted as box plots; the maximum length of the whiskers corresponds to 1.5 times the interquartile range. In all cases, the sub-cohorts were compared only with respect to the same virus strain. Only two-sided tests were employed. Differences for a continuous variable between the sub-cohorts were analyzed using the Mann-Whitney U test. Significance threshold was set at 0.050. Since this study had an exploratory nature, we did not perform an adjustment for multiple testing.<sup>3</sup>

## Supplementary References

1. Thieme CJ, Anft M, Paniskaki K, et al. Robust T Cell Response Toward Spike, Membrane, and Nucleocapsid SARS-CoV-2 Proteins Is Not Associated with Recovery in Critical COVID-19 Patients. *Cell Reports Med.* 2020;1(6):100092. doi:10.1016/j.xcrm.2020.100092
2. Grifoni A, Weiskopf D, Ramirez SI, et al. Targets of T cell responses to SARS-CoV-2 coronavirus in humans with COVID-19 disease and unexposed individuals. *Cell.* 2020;181(7):1489-1501.e15. doi:10.1016/j.cell.2020.05.015
3. Bender R, Lange S. Adjusting for multiple testing - When and how? *J Clin Epidemiol.* 2001;54(4):343-349. doi:10.1016/S0895-4356(00)00314-0
